# Supplementary material for: Vanadium nitride nanoparticle decorated N-doped carbon nanotube/N-doped carbon nanosheet hybrids via a C3N4 self-sacrificing method for electrochemical capacitors
Source: Royal Society of Chemistry journal article supplement (doi:10.1039/d2ra02789e), 2022-01-01
Supplement: d2ra02789e1.pdf [file d2ra02789e1.pdf]

**Vanadium nitride nanoparticle decorated N-doped carbon  
nanotube/N-doped carbon nanosheet hybrids via a C<sub>3</sub>N<sub>4</sub> self-  
sacrificing method for electrochemical capacitors**

Jinghua Liu,<sup>a</sup> Xiong He, <sup>\*a</sup> Fei Guo, <sup>a</sup> Baosheng Liu, <sup>a</sup> Zijun Sun, <sup>a</sup> Li Zhang, <sup>a</sup> Haixin  
Chang <sup>\*b</sup>

*<sup>a</sup>School of Microelectronics and Materials Engineering, Guangxi University of  
Science and Technology, Liuzhou 545000, China.*

*<sup>b</sup>Quantum-Nano Matter and Device Lab, State Key Laboratory of Material  
Processing and Die & Mould Technology, School of Materials Science and  
Engineering, Huazhong University of Science and Technology, Wuhan 430074, China*

\*Corresponding author: Tel.: +86-0772-2686550

E-mail address: [hexiong@gxust.edu.cn](mailto:hexiong@gxust.edu.cn), [hxchang@hust.edu.cn](mailto:hxchang@hust.edu.cn)

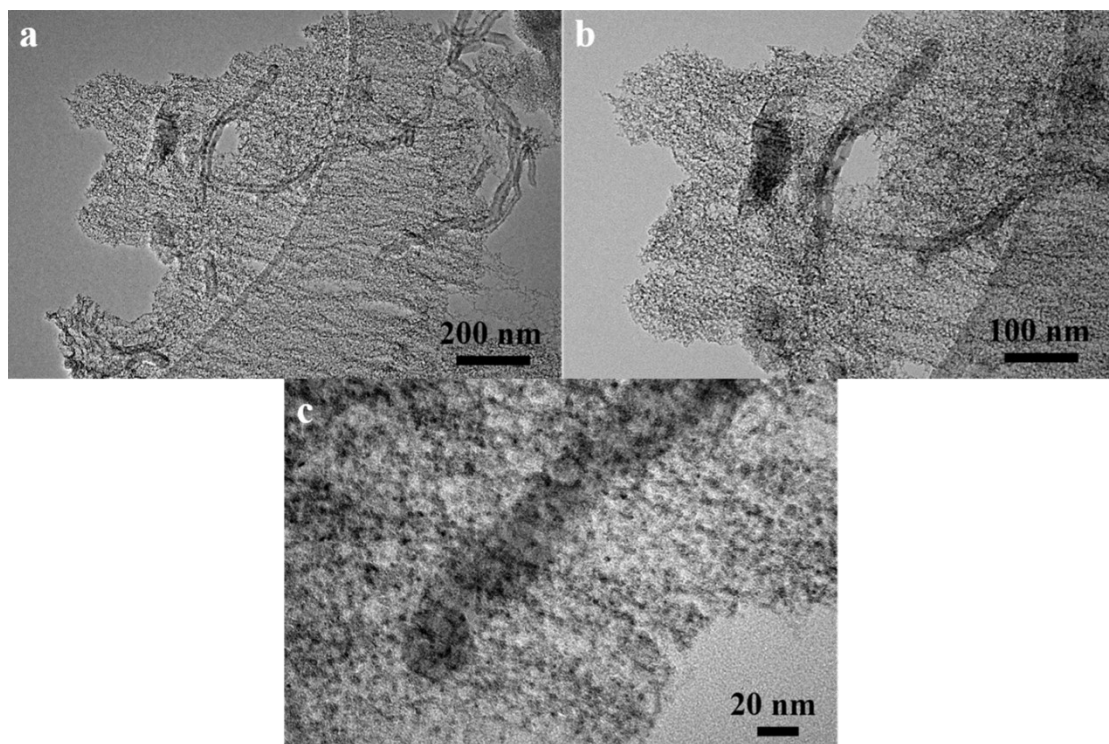

**Fig.S1** TEM images of VN/NCNT/NCN-2 hybrids

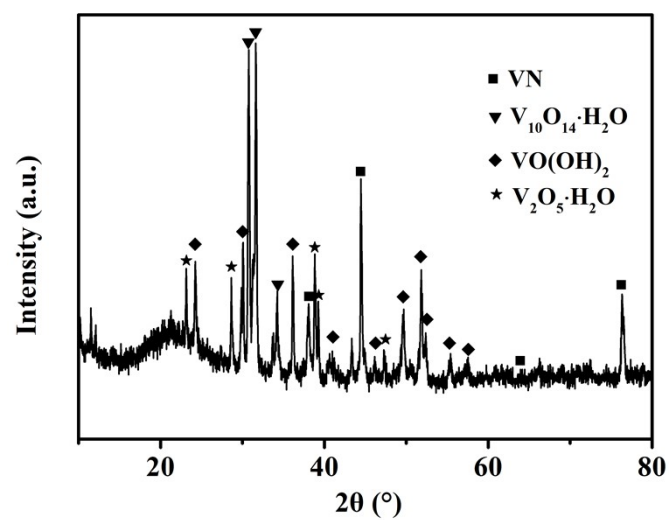

**Fig. S2** XRD pattern of VN/NCNT/NCN-2 electrode film after 5000-cycle charge-discharge tests

**Table S1** Summary of the cyclic stability of recently reported VN, vanadium-based/carbon hybrids, other supercapacitor electrode materials

| Materials                                                   | Electrolytes   | Current density            | Cyclic cycles      | Cs retention |
|-------------------------------------------------------------|----------------|----------------------------|--------------------|--------------|
| VN hollow fiber [1]                                         | 2 M KOH        | 5 A g <sup>-1</sup>        | 1000 cycles        | 54%          |
| VN nanoflake [2]                                            | 2 M KOH        | 1 A g <sup>-1</sup>        | 1000 cycles        | 66%          |
| Mesoporous VN [3]                                           | 6 M KOH        | 10 A g <sup>-1</sup>       | 5000 cycles        | 83%          |
| VN/N-graphene-700 [4]                                       | 2 M KOH        | 2 A g <sup>-1</sup>        | 2000 cycles        | 73.9%        |
| VN nanoparticles/carbon sheet [5]                           | 1 M KOH        | 1 A g <sup>-1</sup>        | 5000 cycles        | 75.8%        |
| VN/PEDOT [6]                                                | KOH/PVA        | 10 A g <sup>-1</sup>       | 5000 cycles        | 91.5%        |
| Graphene-NiFe <sub>2</sub> O <sub>4</sub> nanocomposite [7] | 2 M KOH        | 8 A g <sup>-1</sup>        | 10000 cycles       | 94%          |
| Graphene-NiCo <sub>2</sub> O <sub>4</sub> Nanorod [8]       | 2 M KOH        | 8 A g <sup>-1</sup>        | 10000 cycles       | 94%          |
| <b>this work</b>                                            | <b>6 M KOH</b> | <b>10 A g<sup>-1</sup></b> | <b>5000 cycles</b> | <b>91%</b>   |

## References

- [1] J. X. Zhao, B. Liu, S. Xu, J. Yang and Y. Lu, Fabrication and electrochemical properties of porous VN hollow nanofibers, *J. Alloy. Compd.*, 2015, 651, 785-792.
- [2] Z. Q. Hou, K. Guo, H. Q. Li and T. Y. Zhai, Facile synthesis and electrochemical properties of nanoflake VN for supercapacitors, *Crystengcomm*, 2016, 18, 3040-3047.
- [3] H. M. Lee, G. H. Jeong, S. W. Kim and C. K. Kim, Low-temperature direct synthesis of mesoporous vanadium nitrides for electrochemical capacitors, *Applied Surface Science*, 2017, 400, 194-199.
- [4] J. H. Liu, F. F. Li, W. W. Liu and X. Li, Effect of calcination temperature on the microstructure of vanadium nitride/nitrogen-doped graphene nanocomposites as anode materials in electrochemical capacitors, *Inorganic Chemistry Frontiers*, 2019, 6, 164-171.
- [5] H. Y. Wu, M. L. Qin, Z. Q. Cao, X. L. Li, B. R. Jia and X. H. Qu, Highly efficient synthesis of 2D VN nanoparticles/carbon sheet nanocomposites and their application as supercapacitor electrodes, *Applied Surface Science*, 2019, 466, 982-988.
- [6] M. H. Chen, H. Fan, Y. Zhang, X. Q. Liang, Q. G. Chen and X. H. Xia, Coupling PEDOT on Mesoporous Vanadium Nitride Arrays for Advanced Flexible All-Solid-State Supercapacitors, *Small*, 2020, 16.
- [7] M. Sethi, U. S. Shenoy and D. K. Bhat, A porous graphene-NiFe<sub>2</sub>O<sub>4</sub> nanocomposite with high electrochemical performance and high cycling stability for energy storage applications, *Nanoscale Advances*, 2020, 2, 4229-4241.
- [8] M. Sethi, U. S. Shenoy and D. K. Bhat, Porous graphene-NiCo<sub>2</sub>O<sub>4</sub> nanorod hybrid composite as a high performance supercapacitor electrode material, *New Journal Of Chemistry*, 2020, 44, 4033-4041.
